# Supplementary material for: Smoking Is Associated with Shortened Airway Cilia
Source: PLOS journal article supplement (doi:10.1371/journal.pone.0008157), 2009-12-15
Supplement: S1 (10.1371/journal.pone.0008157.s001) [file journal.pone.0008157.s001]

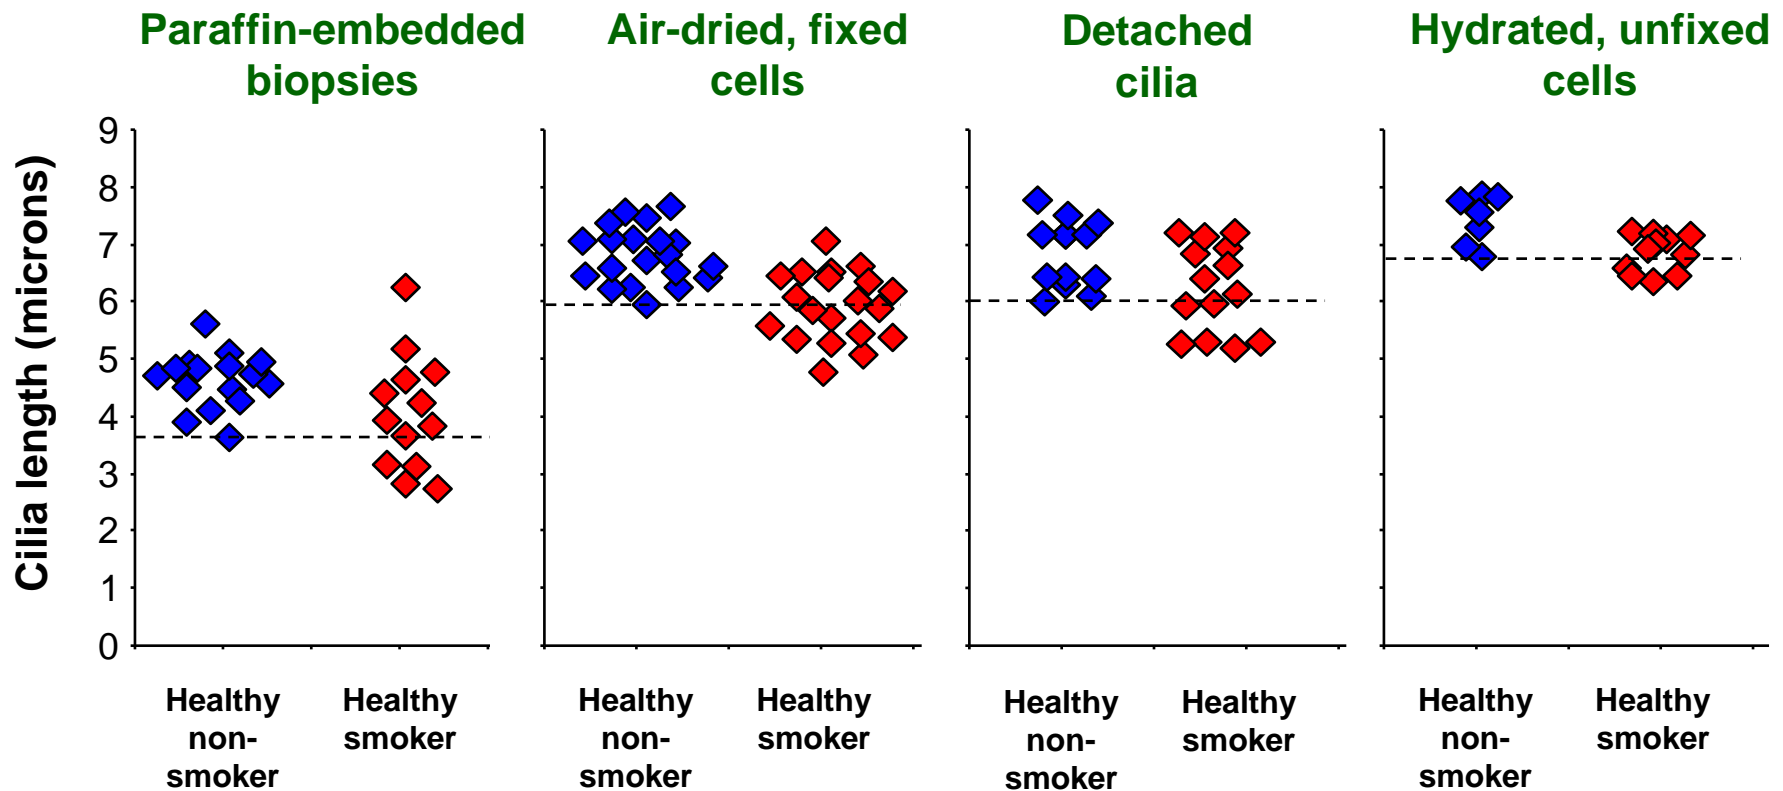

- 23% of smokers had a shorter mean cilia length than the lowest nonsmoker mean cilia length in biopsies

- 50% of smokers had a shorter mean cilia length than the lowest nonsmoker mean cilia length in air-dried, fixed cells

- 29% of smokers had a shorter mean detached cilia length than the lowest nonsmoker mean detached cilia length

- 36% of smokers had a shorter mean cilia length than the lowest nonsmoker mean cilia length in hydrated cells
